# Supplementary material for: Computationally efficient, exact, covariate-adjusted genetic principal component analysis by leveraging individual marker summary statistics from large biobanks
Source: PubMed Central journal article supplement (PMC6907735), 2020
Supplement: NIHMS1061512-supplement-1.pdf [file NIHMS1061512-supplement-1.pdf]

**Supplementary Materials for *Computationally efficient, exact  
covariate-adjusted multivariate methods for genetic analysis leveraging  
summary statistics from large biobanks***

**Theorem 1 (Equation 8).** *Let  $\mathbf{y}_1 = \mathbf{X}\beta_1 + \varepsilon_1$ ,  $\mathbf{y}_2 = \mathbf{X}\beta_2 + \varepsilon_2, \dots$ ,  $\mathbf{y}_m = \mathbf{X}\beta_m + \varepsilon_m$ . Then, for  $c_1\mathbf{y}_1 + c_2\mathbf{y}_2 + \dots + c_m\mathbf{y}_m = \mathbf{X}\beta$ ,*

$$\hat{\beta} = c_1\hat{\beta}_1 + c_2\hat{\beta}_2 + \dots + c_m\hat{\beta}_m.$$

**Proof.** Define  $\mathbf{y} = c_1\mathbf{y}_1 + c_2\mathbf{y}_2 + \dots + c_m\mathbf{y}_m$ . Then,

$$\begin{aligned} c_1\mathbf{X}'\mathbf{y}_1 + c_2\mathbf{X}'\mathbf{y}_2 + \dots + c_m\mathbf{X}'\mathbf{y}_m &= c_1 \begin{bmatrix} \sum_{i=1}^n y_{1i} \\ \sum_{i=1}^n x_{1i}y_{1i} \\ \vdots \\ \sum_{i=1}^n x_{pi}y_{1i} \end{bmatrix} + c_2 \begin{bmatrix} \sum_{i=1}^n y_{2i} \\ \sum_{i=1}^n x_{1i}y_{2i} \\ \vdots \\ \sum_{i=1}^n x_{pi}y_{2i} \end{bmatrix} + \dots + c_m \begin{bmatrix} \sum_{i=1}^n y_{mi} \\ \sum_{i=1}^n x_{1i}y_{mi} \\ \vdots \\ \sum_{i=1}^n x_{pi}y_{mi} \end{bmatrix} \\ &= \begin{bmatrix} c_1 \sum_{i=1}^n y_{1i} + c_2 \sum_{i=1}^n y_{2i} + \dots + c_m \sum_{i=1}^n y_{mi} \\ c_1 \sum_{i=1}^n x_{1i}y_{1i} + c_2 \sum_{i=1}^n x_{1i}y_{2i} + \dots + c_m \sum_{i=1}^n x_{1i}y_{mi} \\ \vdots \\ c_1 \sum_{i=1}^n x_{pi}y_{1i} + c_2 \sum_{i=1}^n x_{pi}y_{2i} + \dots + c_m \sum_{i=1}^n x_{pi}y_{mi} \end{bmatrix} \\ &= \mathbf{X}'\mathbf{y}. \end{aligned}$$

Therefore,

$$\begin{aligned} \beta &= (\mathbf{X}'\mathbf{X})^{-1}\mathbf{X}'\mathbf{y} \\ &= (\mathbf{X}'\mathbf{X})^{-1}(c_1\mathbf{X}'\mathbf{y}_1 + c_2\mathbf{X}'\mathbf{y}_2 + \dots + c_m\mathbf{X}'\mathbf{y}_m) \\ &= c_1(\mathbf{X}'\mathbf{X})^{-1}\mathbf{X}'\mathbf{y}_1 + c_2(\mathbf{X}'\mathbf{X})^{-1}\mathbf{X}'\mathbf{y}_2 + \dots + c_m(\mathbf{X}'\mathbf{X})^{-1}\mathbf{X}'\mathbf{y}_m \\ &= c_1\hat{\beta}_1 + c_2\hat{\beta}_2 + \dots + c_m\hat{\beta}_m, \end{aligned}$$

as desired. □
